# Supplementary material
Source: HighWire-hosted journal article supplement (https://www.cmaj.ca/highwire/filestream/57762/field_highwire_adjunct_files/3/acupunct-lee-appendix_4.pdf)
Supplement: acupunct-lee-appendix_4.pdf [file acupunct-lee-appendix_4.pdf]

## Appendix 4 (as supplied by the authors): Summary of treatment points and other information related with acupuncture treatment

| First author (Year) <sup>ref</sup>  | Acupuncture method (practitioner)                              | Total number of sessions | Acupuncture points                                                                                                                                                                                                                                                                                                                                                                                                                             | Rationales         | Adverse events                                                                                                                                                                                                                                 |
|-------------------------------------|----------------------------------------------------------------|--------------------------|------------------------------------------------------------------------------------------------------------------------------------------------------------------------------------------------------------------------------------------------------------------------------------------------------------------------------------------------------------------------------------------------------------------------------------------------|--------------------|------------------------------------------------------------------------------------------------------------------------------------------------------------------------------------------------------------------------------------------------|
| Gosman-Hedstrom (1998) <sup>1</sup> | CA with MS, ES (4 physiotherapists)                            | 20                       | Fixed points (10)<br>LI4, LI11, ST38, and Ex mob paretic (bilateral)<br>TE5 (unilateral, nonparetic side), GV20                                                                                                                                                                                                                                                                                                                                | TCM theory         | n.r.                                                                                                                                                                                                                                           |
| Schuler (2005) <sup>2</sup>         | CA with ES (3 physicians of TCM)                               | 8                        | n.r.                                                                                                                                                                                                                                                                                                                                                                                                                                           | n.r.               | falls without fractures<br>(AT:56, placebo:59, control:57),<br>recurrent strokes (1, 2, 0),<br>deep-vein thrombosis (1, 0, 0),<br>delirium (2, 1, 3),<br>seizures (1, 0, 0)<br>superficial hematoma around the<br>acupuncture points (3, 2, 0) |
| Hopwood (2007) <sup>3</sup>         | CA & SA with ES (physiotherapists)                             | 12                       | CA : LI4, LI10(ES), LI15, TE5(ES), GB31(ES), GB34(ES), GB38, GB43, and optional use GB20(EA), ST36(EA)<br>SA (4) : 2 points of the motor line, 1 point the upper and lower limb junction, and 1 point head and upper limb junction                                                                                                                                                                                                             | TCM theory         | 0 case occurred                                                                                                                                                                                                                                |
| Xie (2004) <sup>4</sup>             | EA (n.r.)                                                      | n.r.                     | Brunnstrom stage 1,2<br>:LU10, LI4, TE5, LI10, GB34, ST36, GB39, LR3 (contralateral)<br>Brunnstrom stage 3,4,5<br>: LI4, TE5, LI10, SP9, SP6, BL60 (ipsilateral)                                                                                                                                                                                                                                                                               | n.r.               | n.r.                                                                                                                                                                                                                                           |
| Naeser (1992) <sup>5</sup>          | CA, SA & AA with ES (n.r.)                                     | 20                       | CA : paretic side : LI4, LI11, LI15, TE5, TE9, ST31, ST36, GB34, GB39, LR3, nonparetic side : LI4, LI11, ST36<br>SA : 4-5 points along the motor cortex line (paretic side)<br>AA : Shenmem (bilateral)<br>EA : LI4-LI11, TW5-EX-UE9, GB34-GB39                                                                                                                                                                                                | n.r.               | n.r.                                                                                                                                                                                                                                           |
| Park (2005) <sup>6</sup>            | CA (1 physician of Korean medicine)                            | 9-12                     | Individually tailored acupuncture<br>Common(4) : ST40(bilateral), CV12, GV20, GV26<br>Individualized(6) : by excess or deficiency of the yin and yang<br>1) BL66, LI1, HT3, HT4, GB43, GB44<br>2) LU8, SP3, HT8, HT9, KI3, KI7<br>3) ST36, LI5, LI11, HT7, HT8, SI5<br>4) SP1, SP2, HT8, HT9, LR1, CV4                                                                                                                                         | Korean acupuncture | Seizure ( real AT : 1)                                                                                                                                                                                                                         |
| Huang (2008) <sup>7</sup>           | A) Back-Shu EA<br>B) CA (n.r.)                                 | 24                       | A) Back-Shu points (BL13,15,17,18,19,20,21,TE5,SI3,ST36,GB39)<br>B) LI15,SI10,LI11,LI10,TE5,LI4,GB31,ST32,GB34, GB39,LR3 (paretic limb)                                                                                                                                                                                                                                                                                                        | TCM theory         | Dizziness (2; n.r. for which groups)                                                                                                                                                                                                           |
| Wayne (2005) <sup>8</sup>           | CA with MS, ES<br>SA with MS only (2 TCM style acupuncturists) | 20                       | *Pool A (treating U/Ex. and L/Ex. hemiparesis)<br>:LI15, LI14, LI11, LI10, LI4, TH14, TH5, TH3, EX-UE9, SI9, SI4, SI3, GB30, GB31, GB34, GB39, GB40, ST34, ST36, ST41, ST42, LR3, EX-LE10<br>Pool B (treating underlying TCM etiology)<br>:KI3, LU5, CV4, LR3, BL18, BL23<br>Pool C (treating associated additional symptoms)<br>:CV23, Extra Yin Yu Yue, HT5, HT7, ST5, ST6, ST7, LI4, EX-HN5, TE17, TE5, EX-HN16, LR3, BL43, BL45, GV20, PC7 | TCM theory         | n.r.                                                                                                                                                                                                                                           |
| Schaechter (2007) <sup>9</sup>      | CA & SA with ES (n.r.)                                         | 20                       | n.r.                                                                                                                                                                                                                                                                                                                                                                                                                                           | TCM theory         | n.r.                                                                                                                                                                                                                                           |
| Fink (2004) <sup>10</sup>           | CA, no-MS (3 acupuncturists)                                   | 8                        | Standard points(4): GB34, GB39, LR3, LI4(paretic limb)<br>Individualized: ST36, LI10(paretic limb), SP6, LU9(bilateral), GV20                                                                                                                                                                                                                                                                                                                  | TCM theory         | n.r.                                                                                                                                                                                                                                           |

<sup>1</sup>Pool (at each treatment, 10-15 points were chosen from pool A, 3-5 points from pool B, 1-2 points from pool C)

EA: Electro acupuncture; CA: Classic acupuncture; SA: Scalp acupuncture; AA: Auricular acupuncture; ES: electrical stimulation; MS: manual stimulation; TCM: Traditional Chinese Medicine; n.r.: not reported

## References

- Gosman-Hedstrom G, Claesson L, Klingenstierna U, et al. Effects of acupuncture treatment on daily life activities and quality of life: a controlled, prospective, and randomized study of acute stroke patients. *Stroke* 1998;29:2100-8.
- Schuler MS, Durdak C, Hol NM, et al. Acupuncture treatment of geriatric patients with ischemic stroke: a randomized, double-controlled, single-blind study. *J Am Geriatr Soc* 2005;53:549-50.
- Hopwood V, Lewith G, Prescott P, et al. Evaluating the efficacy of acupuncture in defined aspects of stroke recovery: a randomised, placebo controlled single blind study. *J Neurol* 2008;255:858-66.
- Xie R, Wang D, Wang X. A prospective clinical case-controlled study of electro-acupuncture treatment in patients with acute stroke. *Chin J Geriatr Care* 2004;2:7-11.

Appendix to: Kong JC, Lee MS, Shin BC, et al. Acupuncture for functional recovery after stroke: a systematic review of sham-controlled randomized clinical trials. *CMAJ* 2010. DOI:10.1503/cmaj.091113.

Copyright © 2010 Canadian Medical Association or its licensors

5. Naeser MA, Alexander MP, Stiassny-Eder D, et al. Real versus sham acupuncture in the treatment of paralysis in acute stroke patients: a CT lesion site study. *J Neurol Rehabil* 1992;6:163-73.
6. Park J, White AR, James MA, et al. Acupuncture for subacute stroke rehabilitation: a Sham-controlled, subject- and assessor-blind, randomized trial. *Arch Intern Med* 2005;165:2026-31.
7. Huang F, Liu Y, Yao GX, et al. Clinical observations on treatment of ischemic stroke with acupuncture at back-shu points. *Shanghai J Acupunct Moxibust* 2008, 27:4-7.
8. Wayne PM, Krebs DE, Macklin EA, et al. Acupuncture for upper-extremity rehabilitation in chronic stroke: a randomized sham-controlled study. *Arch Phys Med Rehabil* 2005;86:2248-55.
9. Schaechter JD, Connell BD, Stason WB, et al. Correlated change in upper limb function and motor cortex activation after verum and sham acupuncture in patients with chronic stroke. *J Altern Complement Med* 2007;13:527-32.
10. Fink M, Rollnik JD, Bijak M, et al. Needle acupuncture in chronic poststroke leg spasticity. *Arch Phys Med Rehabil* 2004;85:667-72.
